# Supplementary material
Source: PubMed Central journal article supplement (PMC8325511)

**Appendix Figure 1** Footnote: Adjusted PROMIS global mental health T-scores for significant interaction effects between time period (during the pandemic (2020) versus one year prior (2019)) and subgroup: a) Age, b) Clinical center. \*p<0.05 for comparing each subgroup between time period

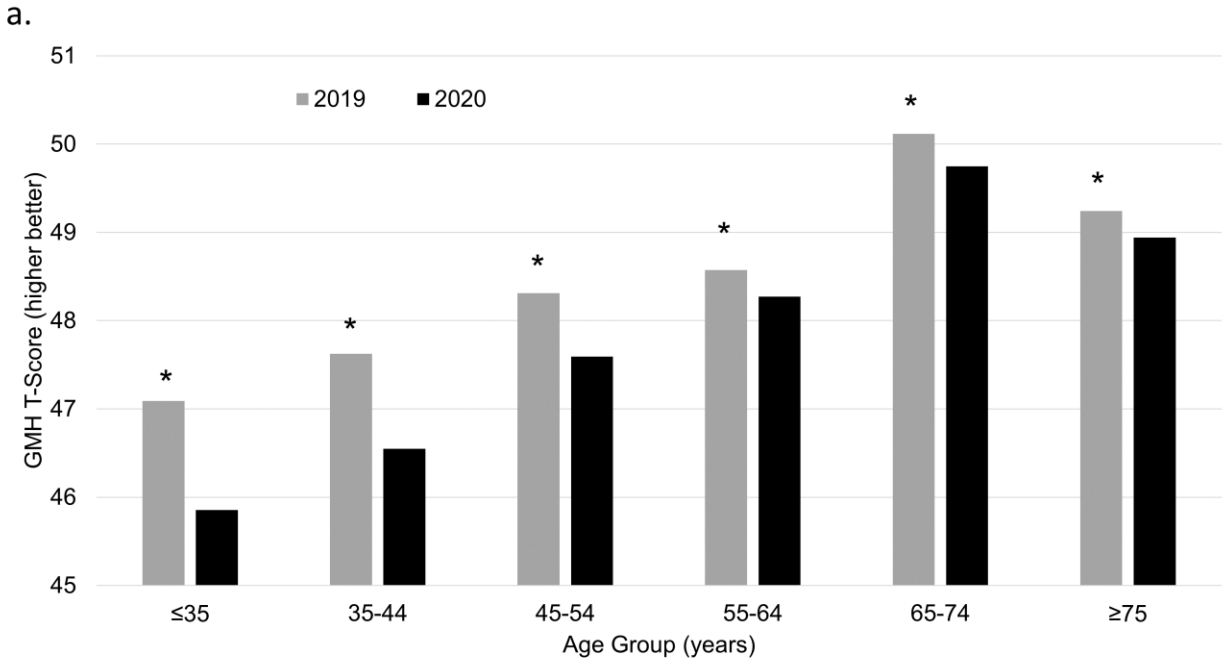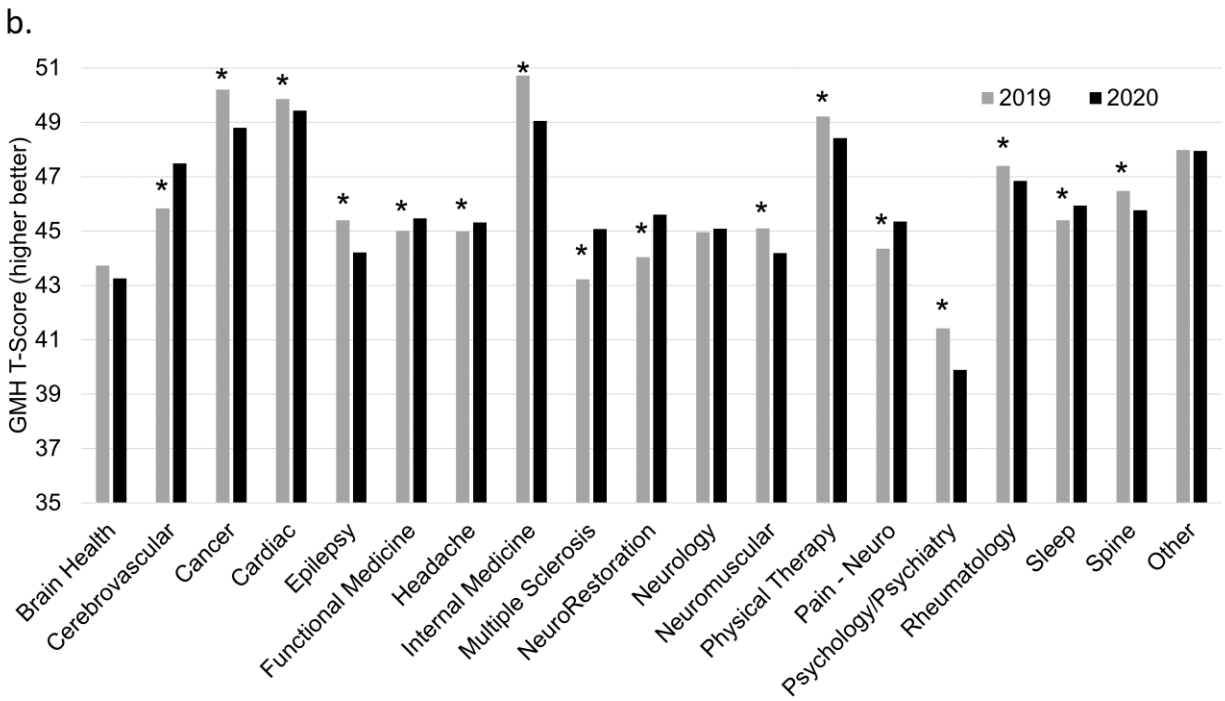

**Appendix Figure 2** Footnote: Adjusted PROMIS a) global mental health, and b) global physical health T-scores for non-significant interaction effects between race and time period (during the pandemic, 2020 versus one year prior, 2019). \* $p < 0.05$  for comparing each subgroup between time period

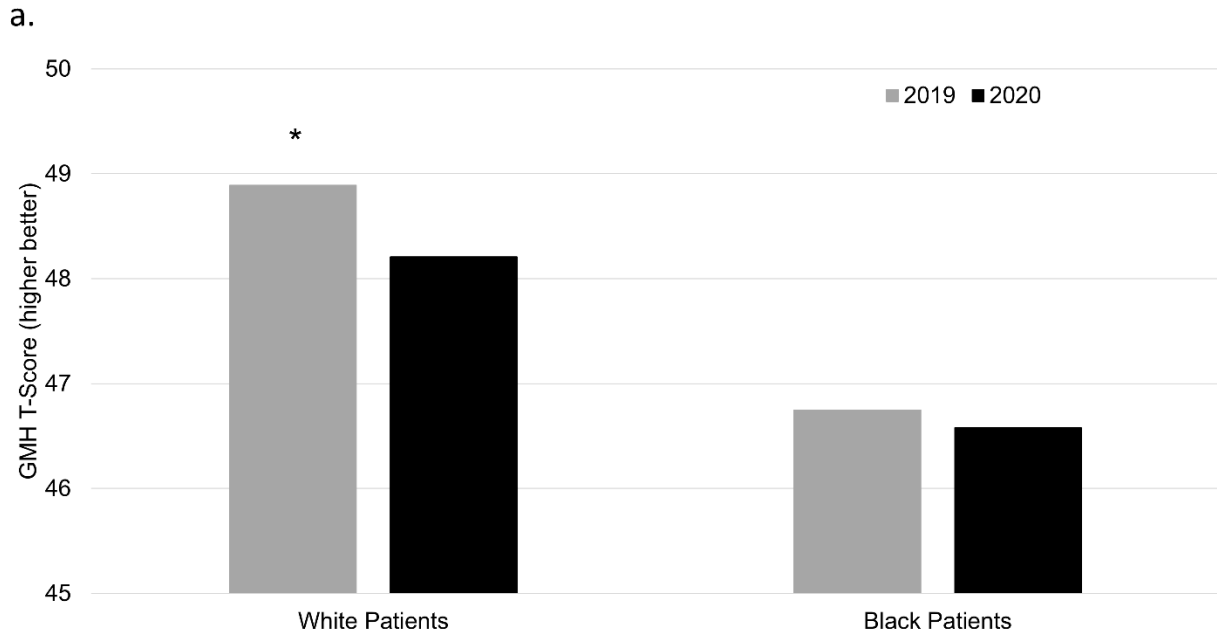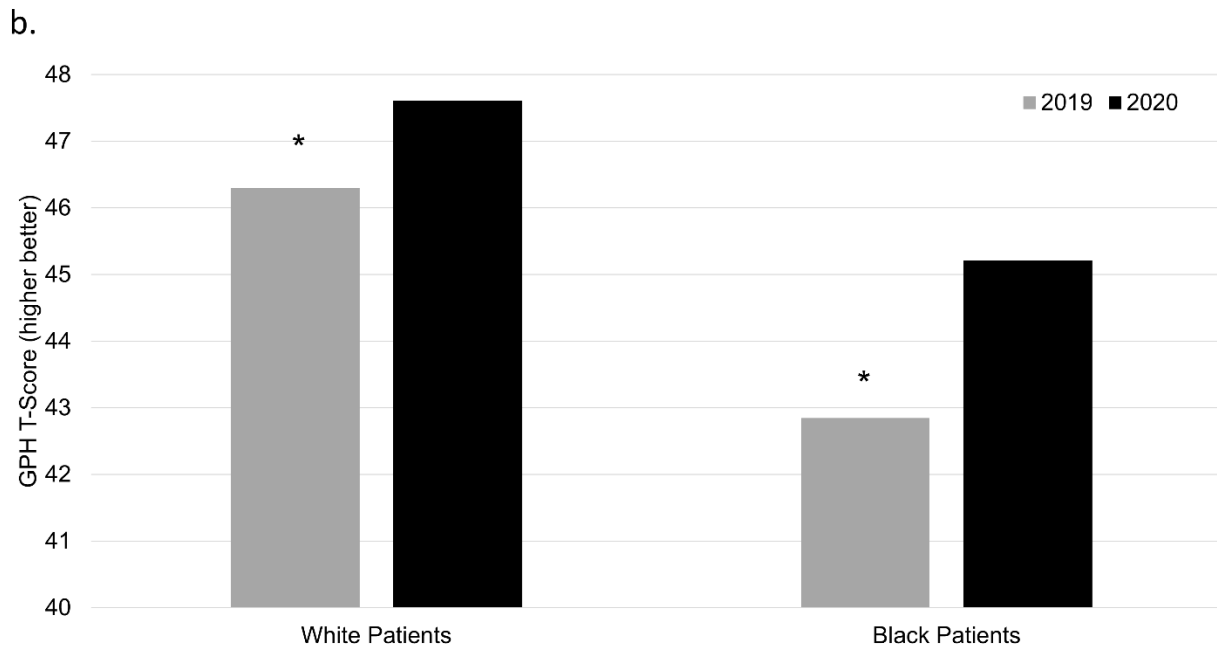

**Appendix Figure 3** Footnote: Adjusted PROMIS a) global mental health, and b) global physical health T-scores for non-significant interaction effects between income tertile and time period (during the pandemic, 2020 versus one year prior, 2019). \* $p < 0.05$  for comparing each subgroup between time period

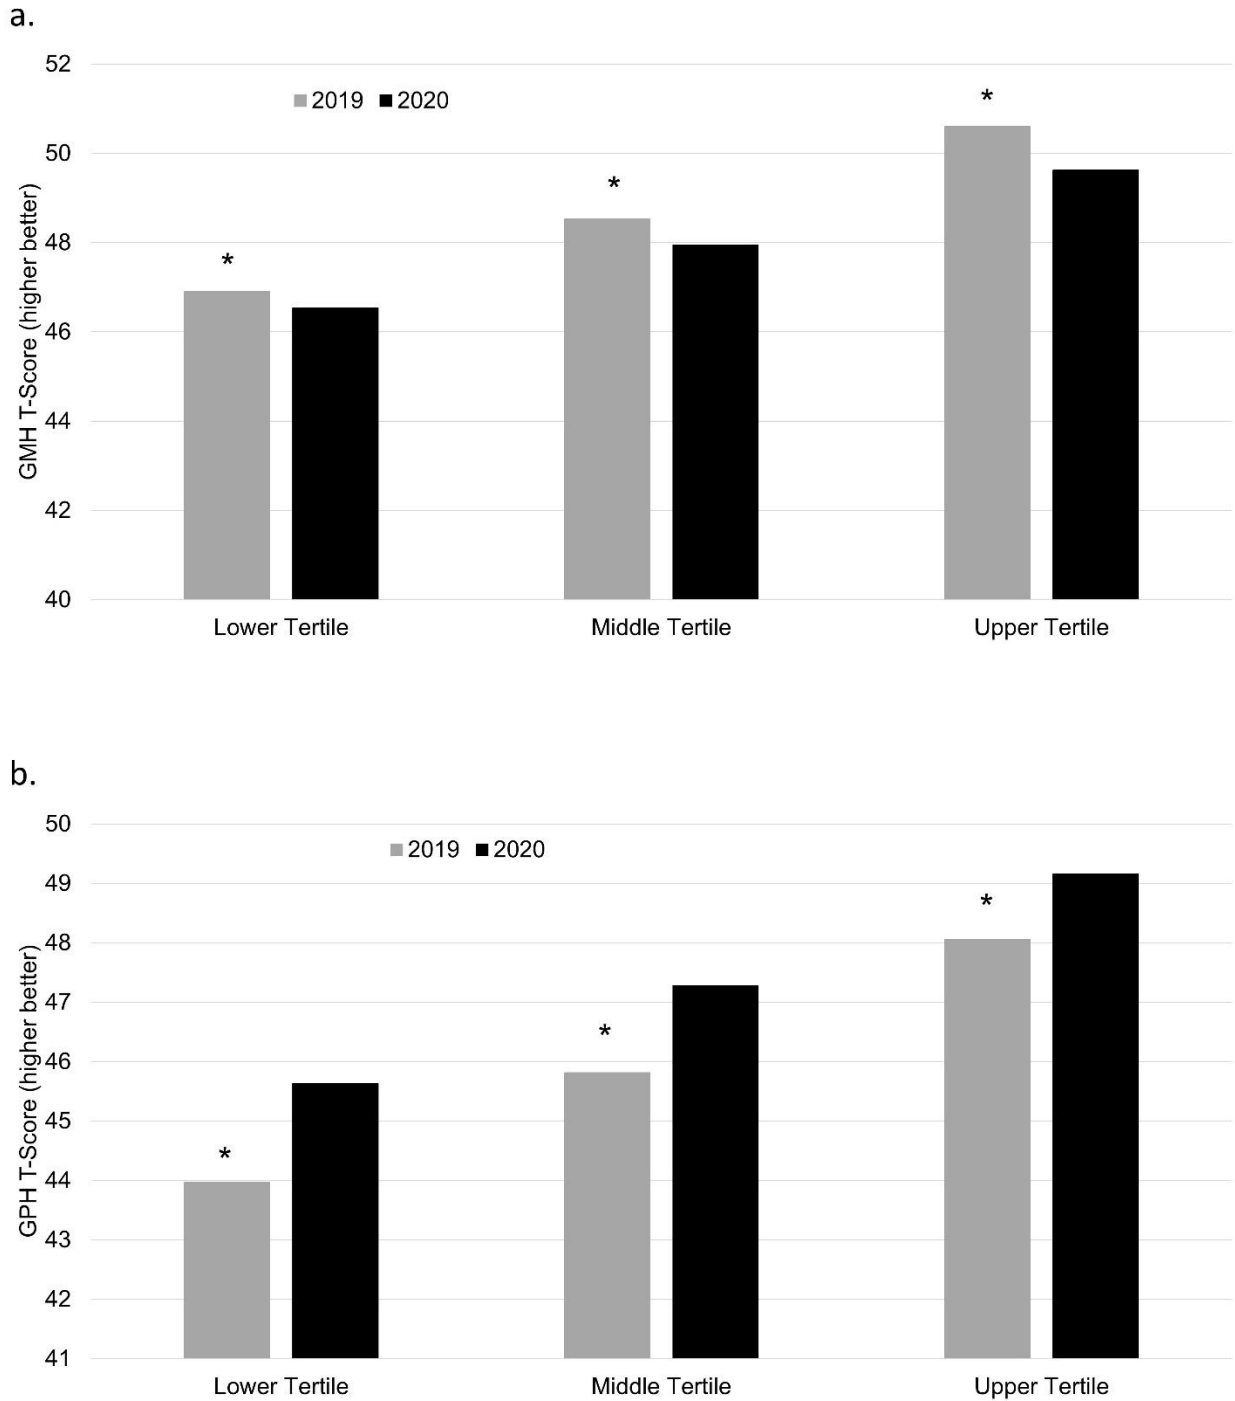

Supplement: mmc1.pdf [file mmc1.pdf]
